# Supplementary material
Source: PubMed Central journal article supplement (PMC3165764)
Supplement: supp_85_18_9568__1.pdf [file supp_85_18_9568__1.pdf]

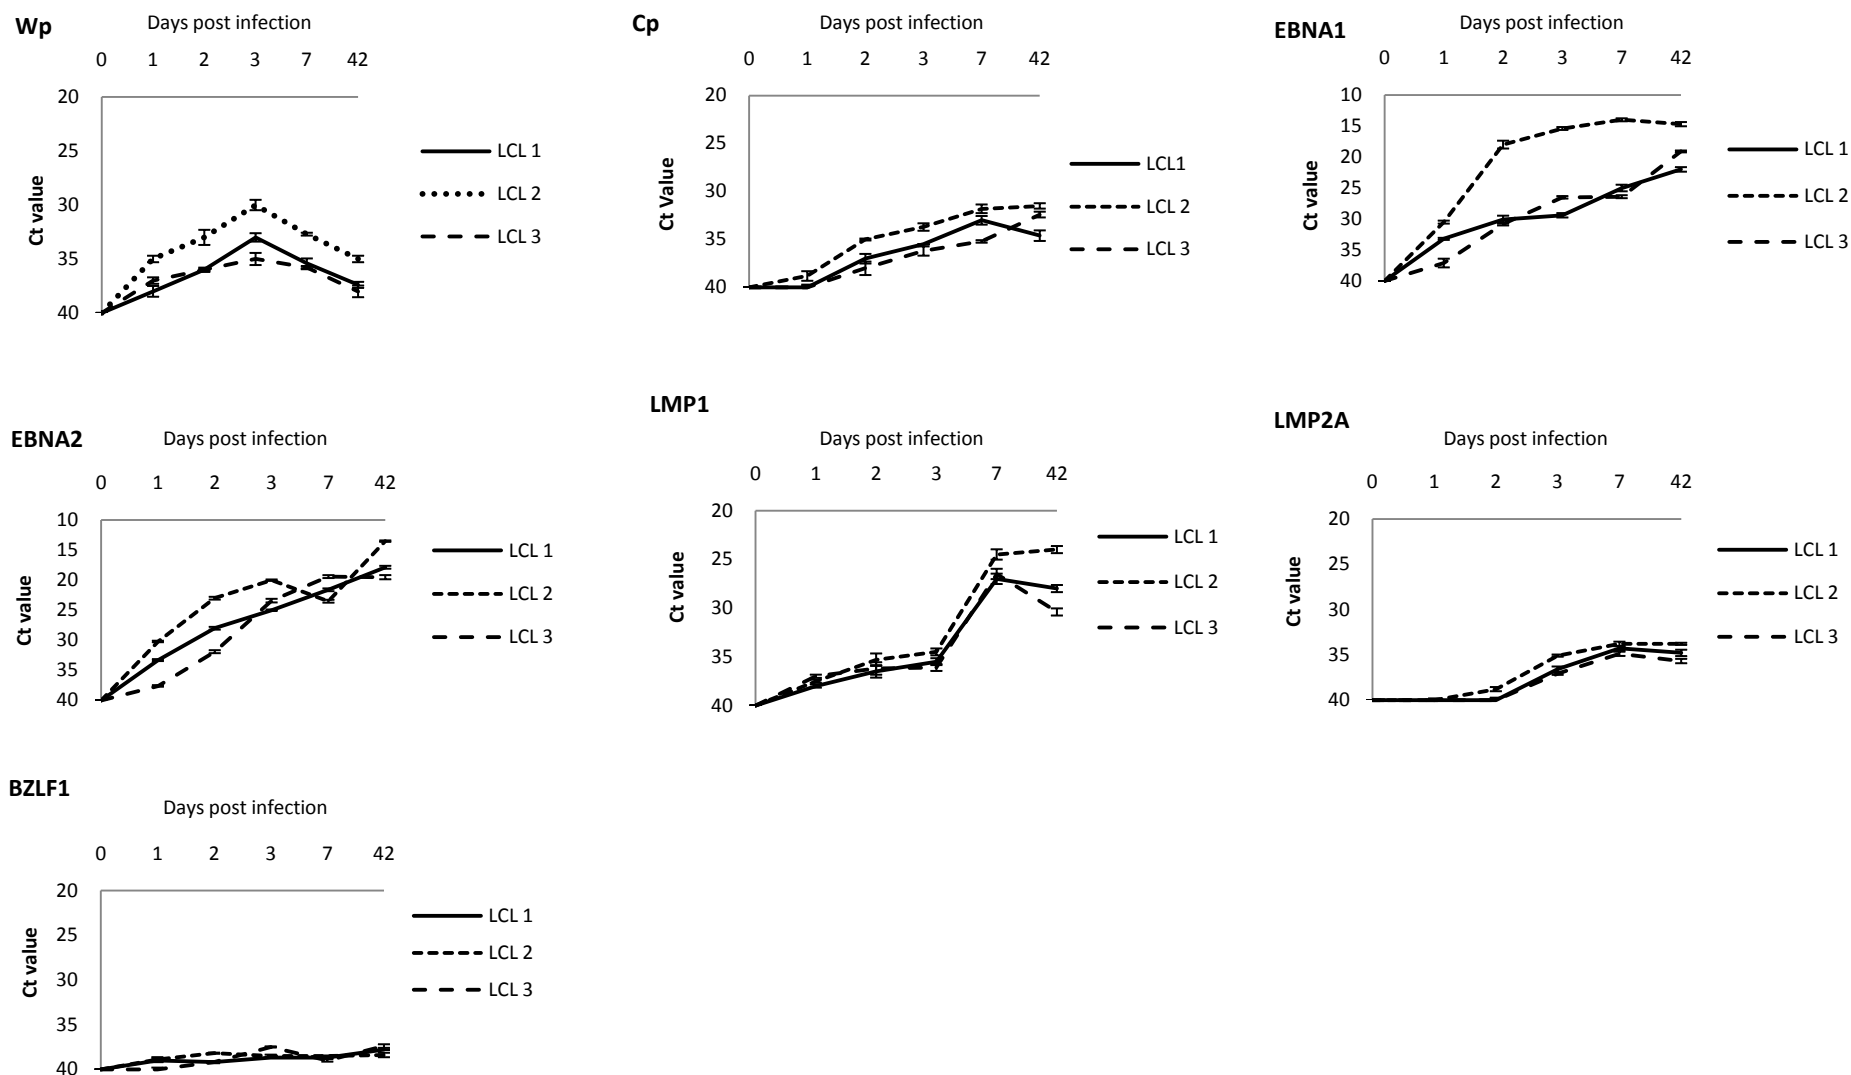

**Supplementary figure 1 : Analysis of EBV gene expression following infection of GC B cells with EBV.** Q-RT PCR showing Wp, Cp, Y3-U-K-spliced EBNA1, EBNA2, LMP1, LMP2A and BZLF1 expression in three GC B cell derived LCLs at different time-points post infection. Assays were performed in triplicate and results are presented as raw Ct values.

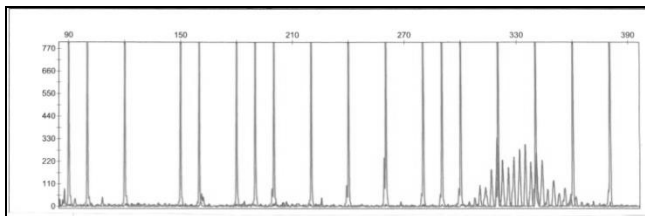

LCL1

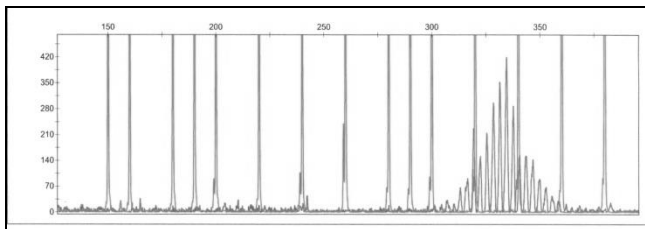

LCL2

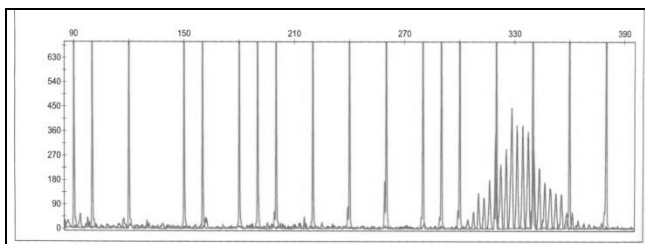

LCL3

**Supplementary figure 2: EBV infected GC B cells are polyclonal six weeks post infection.** PCR was used for the detection of immunoglobulin heavy (IGH) chain gene rearrangements. Results are negative for clonal IGH chain gene rearrangement consistent with the presence of a polyclonal B-cell population. The method used is described in Linke *et al.*, 1997.
